# Supplementary material
Source: publisher figshare collection journal article supplement (https://sage.figshare.com/ndownloader/files/18531182)
Supplement: Supplementary file 1 [file 18531182]

|                                        | PE (n = 23)          |               |        | Sports (n = 62)                        |                                                         |                              | PE and sports (n = 3) |               |    |
|----------------------------------------|----------------------|---------------|--------|----------------------------------------|---------------------------------------------------------|------------------------------|-----------------------|---------------|----|
|                                        | QT                   | QL            | MM     | QT                                     | QL                                                      | MM                           | QT                    | QL            | MM |
| <b>Work ethic (n = 32)</b>             |                      | <b>n = 6</b>  |        |                                        | <b>n = 23</b>                                           |                              |                       | <b>n = 3</b>  |    |
|                                        | 3, 35, 36            | 4, 37         | 88     | 7, 14, 30,<br>32, 45, 73,<br>75, 82a   | 10, 16, 17,<br>24, 33, 47,<br>49, 52, 53,<br>67, 70, 85 | 15, 25,<br>48                |                       | 54, 55,<br>64 |    |
| <b>Control and management (n = 37)</b> |                      | <b>n = 8</b>  |        |                                        | <b>n = 27</b>                                           |                              |                       | <b>n = 2</b>  |    |
|                                        | 3, 35, 39,<br>44, 56 | 37            | 27, 60 | 7, 9, 14,<br>30, 45, 63,<br>71, 72, 75 | 10, 18, 20,<br>24, 33, 38,<br>46, 47, 52,<br>53, 57, 85 | 21, 25,<br>48, 50,<br>65, 86 |                       | 54, 55        |    |
| <b>Goal-setting (n = 14)</b>           |                      | <b>n = 2</b>  |        |                                        | <b>n = 12</b>                                           |                              |                       |               |    |
|                                        | 40                   | 76            |        | 75                                     | 10, 24, 46,<br>47, 51, 52,<br>85                        | 11, 15,<br>25, 86            |                       |               |    |
| <b>Decision-making (n = 5)</b>         |                      | <b>n = 2</b>  |        |                                        | <b>n = 3</b>                                            |                              |                       |               |    |
|                                        |                      | 37, 87        |        |                                        | 38, 47                                                  | 25                           |                       |               |    |
| <b>Problem-solving (n = 8)</b>         |                      | <b>n = 4</b>  |        |                                        | <b>n = 4</b>                                            |                              |                       |               |    |
|                                        | 39, 40               | 29            | 27     |                                        | 10, 67                                                  | 21, 86                       |                       |               |    |
| <b>Responsibility (n = 21)</b>         |                      | <b>n = 5</b>  |        |                                        | <b>n = 15</b>                                           |                              |                       | <b>n = 1</b>  |    |
|                                        | 8                    | 37, 79,<br>87 | 27     | 7, 12, 30,<br>61, 82a                  | 13, 49, 66,<br>70, 74, 85                               | 22, 25,<br>50, 86            |                       | 64            |    |
| <b>Leadership (n = 19)</b>             |                      | <b>n = 3</b>  |        |                                        | <b>n = 16</b>                                           |                              |                       |               |    |
|                                        |                      | 76, 87        | 88     | 73                                     | 10, 17, 18,<br>24, 33, 49,<br>51, 62, 70,<br>74, 79, 85 | 15, 25,<br>86                |                       |               |    |
| <b>Cooperation (n = 35)</b>            |                      | <b>n = 9</b>  |        |                                        | <b>n = 25</b>                                           |                              |                       | <b>n = 1</b>  |    |

|                                                |                                 |                         |                   |                                                               |                                                                        |                                     |               |
|------------------------------------------------|---------------------------------|-------------------------|-------------------|---------------------------------------------------------------|------------------------------------------------------------------------|-------------------------------------|---------------|
|                                                | 3, 35, 42                       | 4, 29,<br>37, 76,<br>78 | 60                | 7, 14, 30,<br>45, 61, 72,<br>73, 75                           | 10, 16, 18,<br>47, 49, 52,<br>53, 57, 66,<br>67, 70, 79,<br>85         | 15, 21,<br>48, 86                   | 64            |
| <b>Meeting people, making friends (n = 27)</b> |                                 | <b>n = 3</b>            |                   |                                                               | <b>n = 23</b>                                                          |                                     | <b>n = 1</b>  |
|                                                | 8                               |                         | 31, 60            | 9, 14, 45,<br>63                                              | 10, 17, 18,<br>19, 24, 33,<br>38, 47, 53,<br>58, 66, 70,<br>74, 79, 84 | 11, 50,<br>65, 86                   | 64            |
| <b>Communication (n = 16)</b>                  |                                 | <b>n = 3</b>            |                   |                                                               | <b>n = 13</b>                                                          |                                     |               |
|                                                | 3                               |                         | 26, 60            | 1, 73, 75                                                     | 24, 33, 47,<br>49, 57, 70                                              | 21, 25<br>48, 50                    |               |
| <b>Prosocial behaviour (n = 54)</b>            |                                 | <b>n = 16</b>           |                   |                                                               | <b>n = 35</b>                                                          |                                     | <b>n = 3</b>  |
|                                                | 3, 35, 36,<br>42, 44, 69,<br>83 | 4, 29,<br>41, 78,<br>87 | 26, 27,<br>31, 88 | 2, 9, 23,<br>28, 43, 59,<br>61, 63, 68,<br>72, 73, 80,<br>82a | 10, 16, 19,<br>24, 33, 34,<br>38, 47, 49,<br>52, 57, 66,<br>70, 79, 85 | 15, 21,<br>25, 48,<br>50, 65,<br>86 | 54, 55,<br>64 |

*Note:* QT = quantitative studies; QL = qualitative studies; MM = mixed-method studies
